# Supplementary material for: Identification and functional analysis of differentially expressed genes in poorly differentiated hepatocellular carcinoma using RNA-seq
Source: PubMed Central journal article supplement (PMC5482631; doi:10.18632/oncotarget.16415), 2017-03-21
Supplement: oncotarget-08-35973-s001.pdf [file oncotarget-08-35973-s001.pdf]

## **Identification and functional analysis of differentially expressed genes in poorly differentiated hepatocellular carcinoma using RNA-seq**

### **Supplementary Materials**

**Supplementary Table 1: The RPKM value of each gene for 18 paired samples.** See Supplementary\_Table\_1

**Supplementary Table 2: Differentially expressed gene list.** See Supplementary\_Table\_2
